# Supplementary material for: Frequency-channel dependent selectivity for temporal call characteristics in gray treefrogs, Hyla versicolor
Source: Oxford University Press journal article supplement (doi:10.1242/jeb.152330), 2017-01-01
Supplement: jeb152330supp.pdf [file jeb152330supp.pdf]

Table S1

List of the experimental stimuli. The pattern of AM is listed separately for each frequency component of each stimulus (LF=low-frequency peak; HF=high-frequency peak). If the call had a unimodal frequency spectrum (i.e., contained only one of the two frequency peaks), the missing frequency peak is depicted by a dash. Full description of the AM patterns is given in the methods and Figs. 1-2, 4-7. ‘Conspecific’: a component with the normal *H. versicolor* AM pattern, ‘Heterospecific’: a component with the *H. chrysoscelis* AM pattern, ‘Heterospecific shape’: a component with *H. versicolor* pulse rate but *H. chrysoscelis* pulse shape and pulse duration, ‘Gappy conspecific’: a component with missing pulses; for every 3 pulses broadcast, 3 pulses were silent, ‘Tone’: a pure tone. Single-speaker tests are denoted by italics. The asterisk refers to single-speaker stimuli that were tested at three different SPLs (85, 65, 56 dB).

| Experiment | Speaker 1              |                        | Speaker 2            |                      |
|------------|------------------------|------------------------|----------------------|----------------------|
|            | LF                     | HF                     | LF                   | HF                   |
| 1          | <i>conspecific</i>     | -                      | -                    | -                    |
|            | -                      | <i>conspecific</i>     | -                    | -                    |
|            | <i>conspecific</i>     | -                      | -                    | conspecific          |
|            | conspecific            | heterospecific         | heterospecific       | conspecific          |
|            | conspecific            | heterospecific shape   | heterospecific shape | conspecific          |
|            | conspecific            | tone                   | tone                 | conspecific          |
|            | conspecific            | gappy                  | gappy                | conspecific          |
| 2          | <i>conspecific*</i>    | <i>conspecific*</i>    | -                    | -                    |
|            | <i>conspecific*</i>    | <i>heterospecific*</i> | -                    | -                    |
|            | <i>heterospecific*</i> | <i>conspecific*</i>    | -                    | -                    |
|            | conspecific            | conspecific            | heterospecific       | conspecific          |
|            | conspecific            | conspecific            | conspecific          | heterospecific       |
|            | conspecific            | conspecific            | heterospecific shape | conspecific          |
|            | conspecific            | conspecific            | conspecific          | heterospecific shape |
|            | conspecific            | -                      | conspecific          | heterospecific       |
|            | conspecific            | -                      | heterospecific       | conspecific          |
|            | -                      | conspecific            | conspecific          | heterospecific       |
|            | -                      | conspecific            | heterospecific       | conspecific          |
| 3          | <i>conspecific*</i>    | <i>tone*</i>           | -                    | -                    |
|            | <i>tone*</i>           | <i>conspecific*</i>    | -                    | -                    |
|            | conspecific            | conspecific            | tone                 | conspecific          |
|            | conspecific            | conspecific            | conspecific          | tone                 |
| 4          | conspecific            | conspecific            | gappy conspecific    | gappy conspecific    |
|            | conspecific            | conspecific            | gappy conspecific    | conspecific          |
|            | conspecific            | conspecific            | conspecific          | gappy conspecific    |
|            | conspecific            | gappy conspecific      | gappy conspecific    | gappy conspecific    |
|            | gappy conspecific      | conspecific            | gappy conspecific    | gappy conspecific    |
